# Supplementary material for: Facile synthesis of ZnNC derived from a ZIF-8 metal-organic framework by the microwave-assisted solvothermal technique as an anode material for lithium-ion batteries
Source: Royal Society of Chemistry journal article supplement (doi:10.1039/d2nj00711h), 2022-01-01
Supplement: d2nj00711h1.pdf [file d2nj00711h1.pdf]

## Supplementary Figures

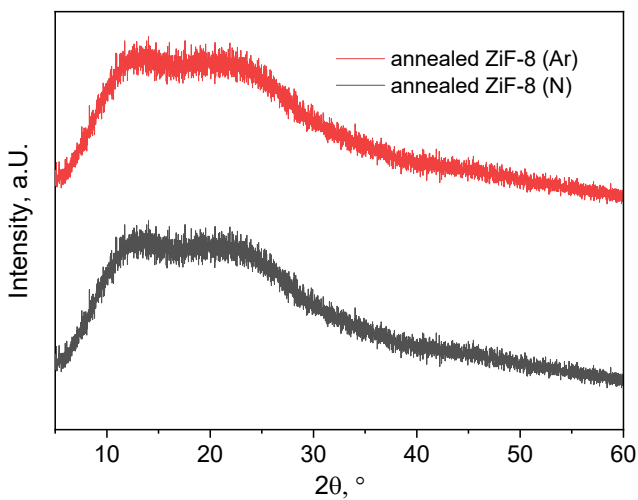

Figure S1: the XRD pattern of annealed Zif-8 under Ar and nitrogen

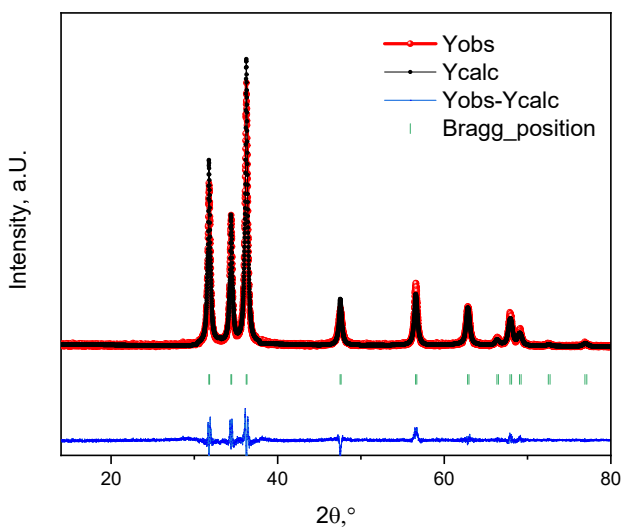

Figure S2: The XRD pattern of an annealed ZIF-8 under Air
